# Supplementary material for: HOT1 is a mammalian direct telomere repeat-binding protein contributing to telomerase recruitment
Source: PubMed Central journal article supplement — EMBO J. 2013 May 17;32(12):1681–701. doi: 10.1038/emboj.2013.105 (PMC3680732; doi:10.1038/emboj.2013.105), 2013-05-17
Supplement: emboj2013105df5c.pdf [file emboj2013105df5c.pdf]

Fig. 5c source data

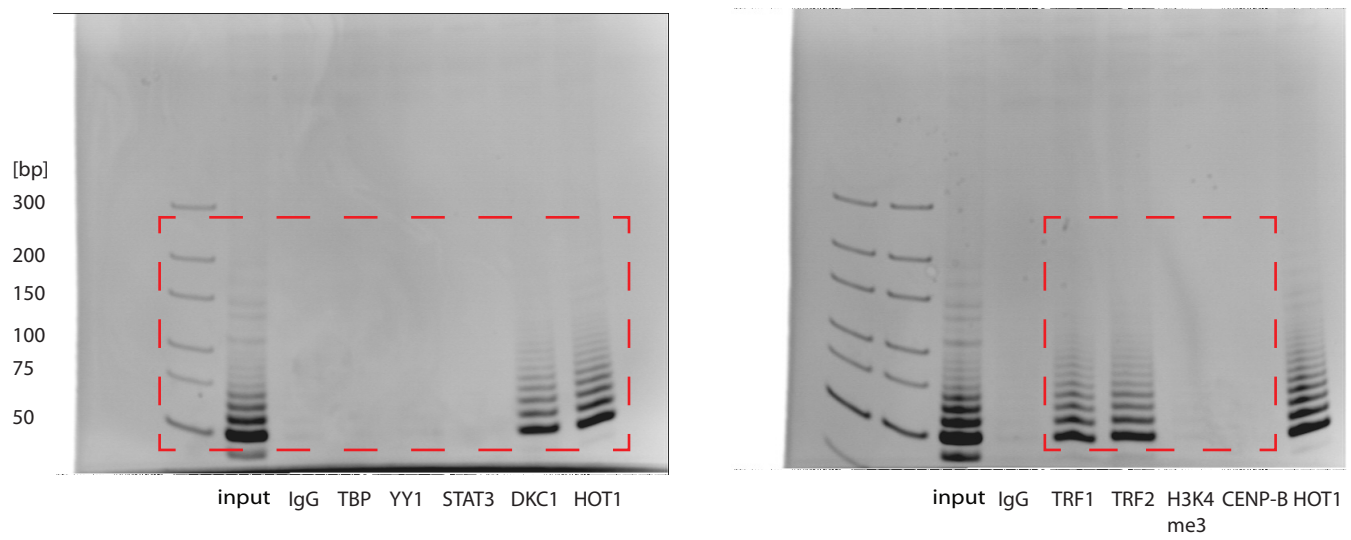

Explanation:

Because of space constraints for loading, two separate gels were run to analyze all samples. Redundant biological replicates for molecular size marker, input sample as well as IgG and HOT1 IPs were spliced out for clearer illustration.
