# Supplementary material for: HOT1 is a mammalian direct telomere repeat-binding protein contributing to telomerase recruitment
Source: PubMed Central journal article supplement — EMBO J. 2013 May 17;32(12):1681–701. doi: 10.1038/emboj.2013.105 (PMC3680732; doi:10.1038/emboj.2013.105), 2013-05-17
Supplement: emboj2013105df7e.pdf [file emboj2013105df7e.pdf]

Fig. 7e source data

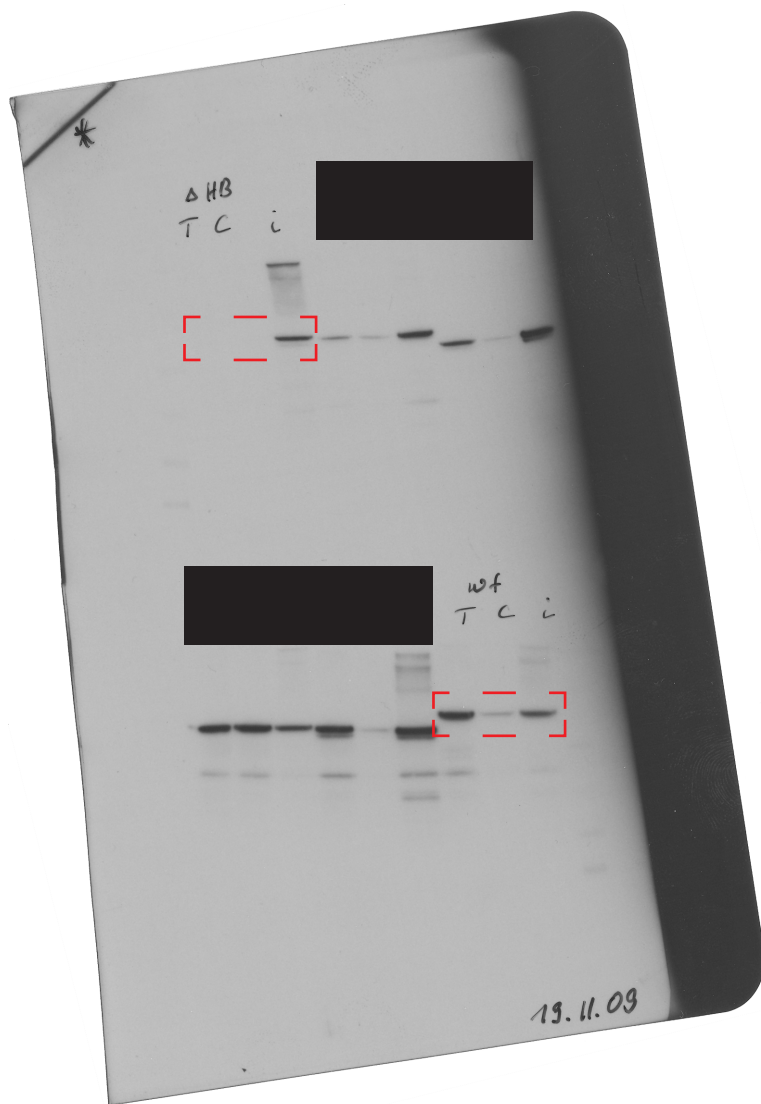

Explanation:  
wt corresponds to FLAG-HOT1 wt and  $\Delta HB$  to FLAG-HOT1 $\Delta$ Homeobox. T represents telomeric DNA (TTAGGG), C a control sequence (GTGAGT) and i the input material (10%).
