# Supplementary material for: HOT1 is a mammalian direct telomere repeat-binding protein contributing to telomerase recruitment
Source: PubMed Central journal article supplement — EMBO J. 2013 May 17;32(12):1681–701. doi: 10.1038/emboj.2013.105 (PMC3680732; doi:10.1038/emboj.2013.105), 2013-05-17
Supplement: emboj2013105dfs7a.pdf [file emboj2013105dfs7a.pdf]

Fig. S7a source data

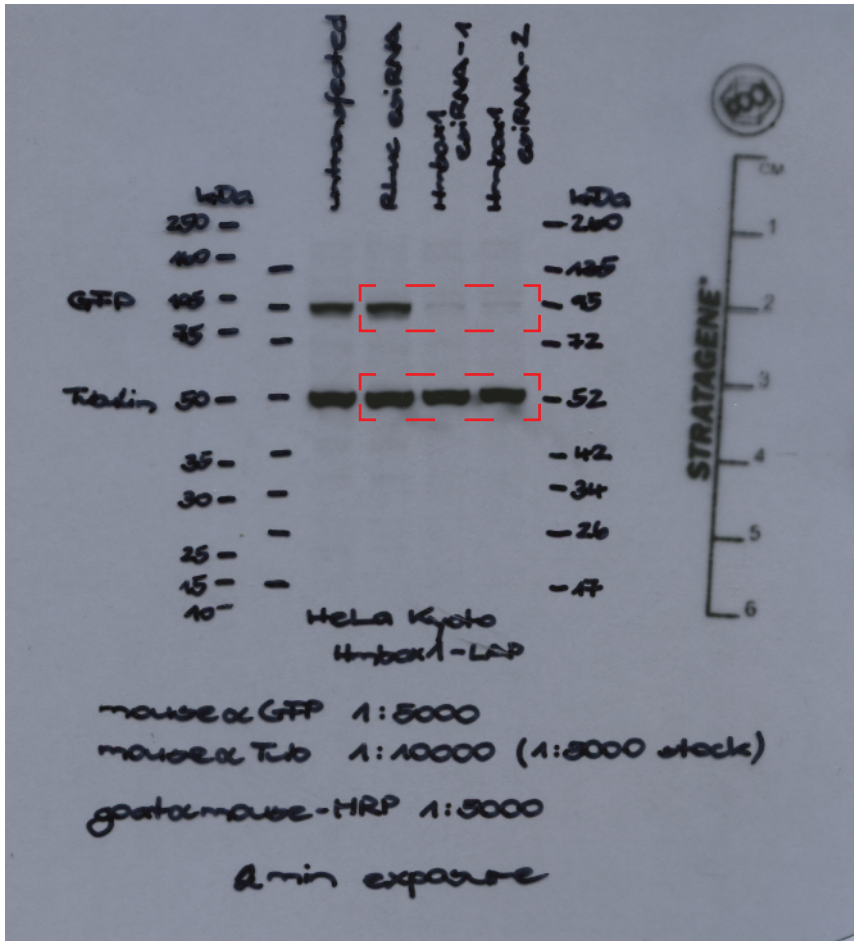

Explanation:

Lanes 2-4 on the source data blot correspond to the data shown in Fig. S7a. Lane 1 does not refer to data shown in Fig. S7 and was spliced out (untransfected sample). GFP and Tubulin antibodies were incubated together on the same membrane.
